# Supplementary material for: NF-κB regulated expression of A20 controls IKK dependent repression of RIPK1 induced cell death in activated T cells
Source: Springer Nature journal article supplement (doi:10.1038/s41418-024-01383-6), 2024-09-26
Supplement: MOESM1 [file 41418_2024_1383_MOESM1_ESM.pdf]

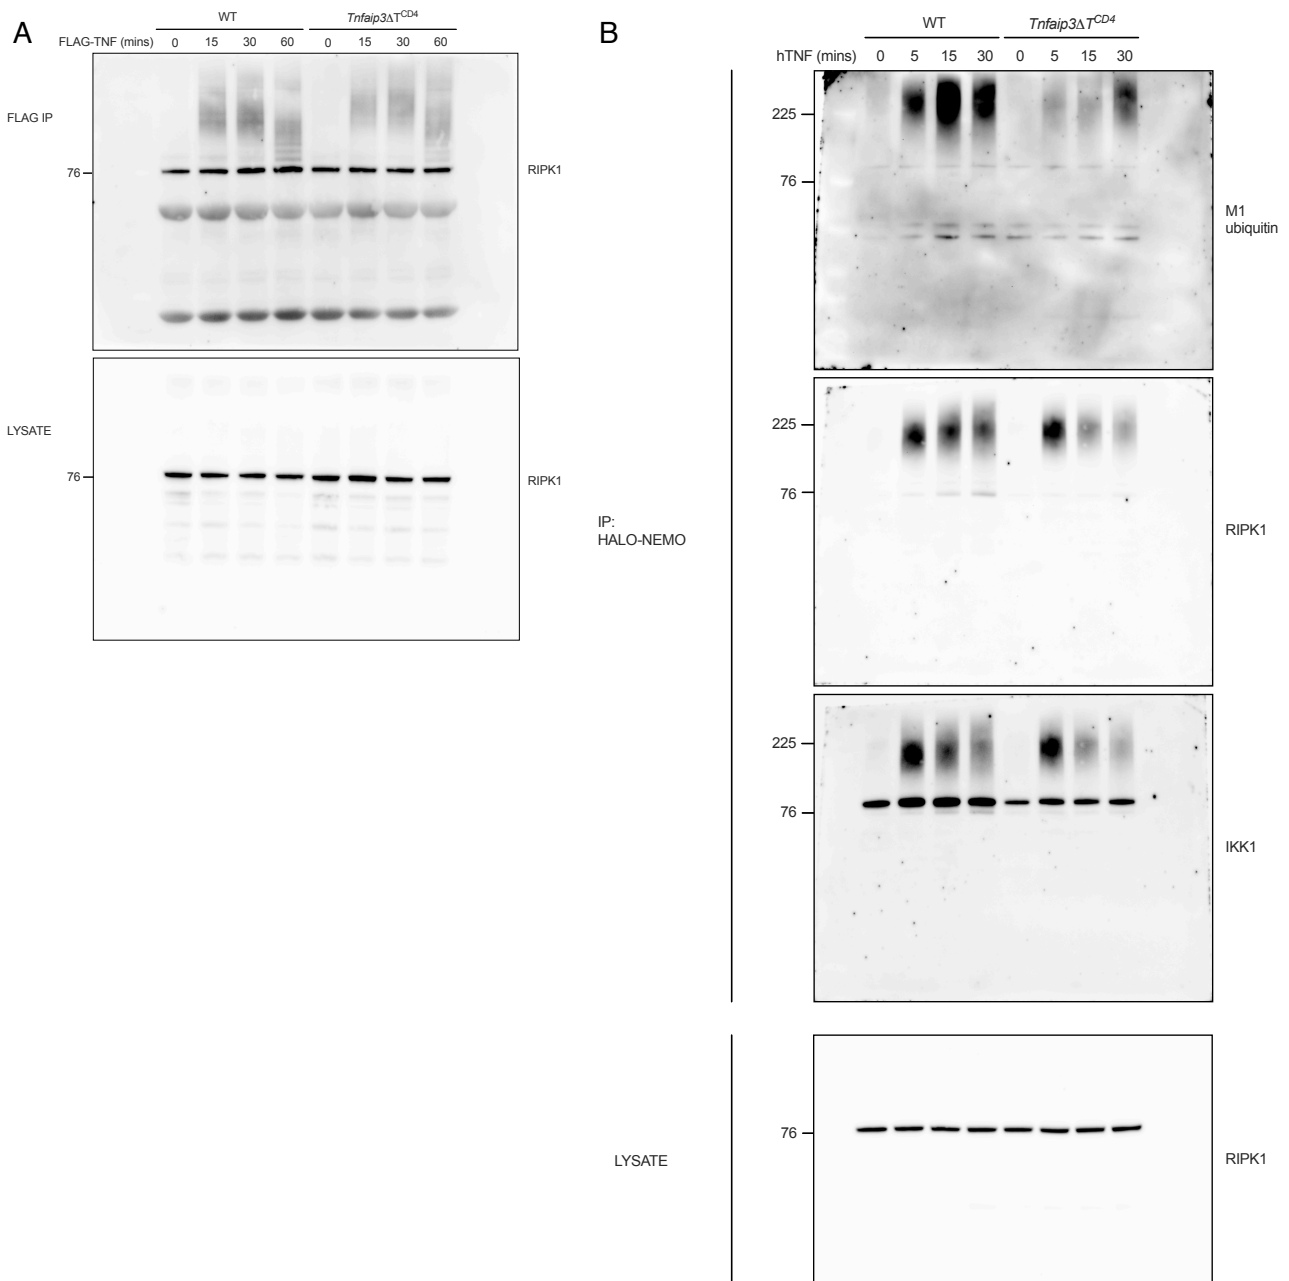

supplementary **Figure 1** - Defective ubiquitin scaffold formation in complex I in *Tnfaip3* deficient T cells. Uncropped images of immunoblots from figure 5B. Thymocytes from *Tnfaip3ΔT<sup>CD4</sup>* and Cre –ve litter mates were stimulated with (A) FLAG-TNF or (B) hTNF for different times, lysed and immunoprecipitated with either anti-FLAG-sepharose or HALO-NEMO beads and analysed by immunoblotting for RIPK1, M1 ubiquitin and IKK1. Data are representative of 3 independent experiments. Uncropped

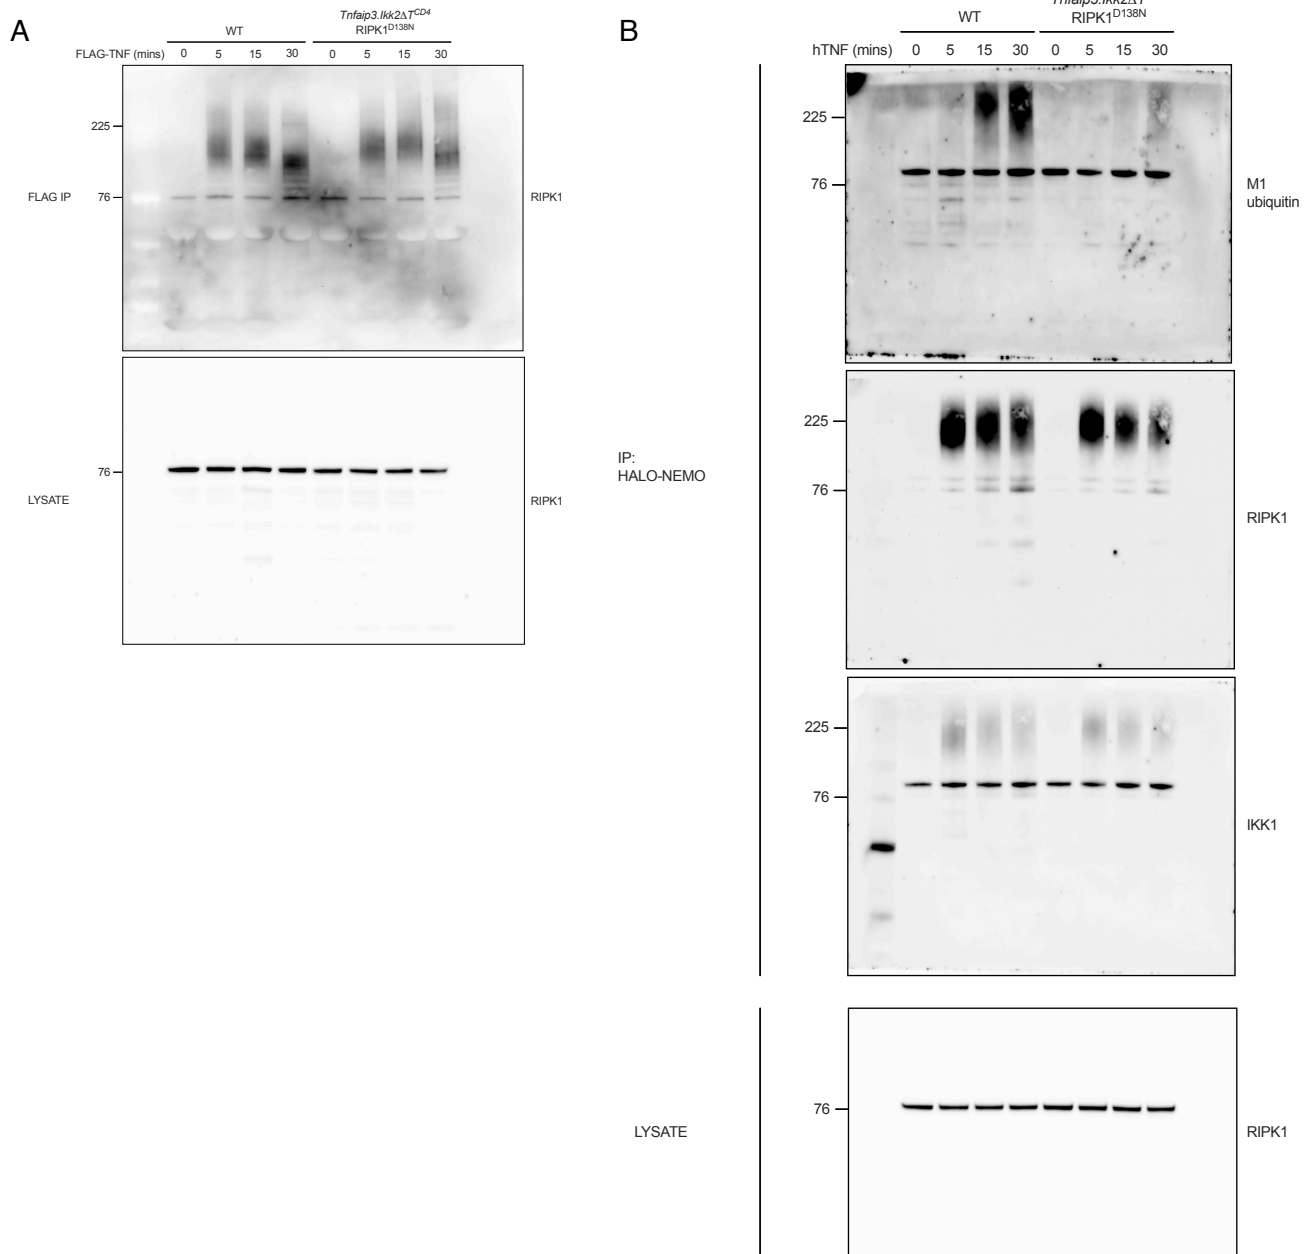

supplementary **Figure 2 - Defective ubiquitin scaffold formation in complex I in *Ikk2.Tnfaip3* deficient T cells.** Thymocytes from *Tnfaip3.Ikk2ΔT<sup>CD4</sup>* RIPK1<sup>D138N</sup> and Cre <sup>-ve</sup> litter mates were stimulated with (A) FLAG-TNF or (B) hTNF for different times, lysed and immunoprecipitated with either anti-FLAG-sepharose or HALO-NEMO beads and analysed by immunoblotting for RIPK1, M1 ubiquitin and IKK1. Data are representative of 3 independent experiments.
